# Supplementary material
Source: PubMed Central journal article supplement (PMC3064374)
Supplement: 1013814108_pnas.201013814SI.pdf [file 1013814108_pnas.201013814SI.pdf]

# Supporting Information

Li et al. 10.1073/pnas.1013814108

## SI Text

**Identification of Recording Sites.** On completion of the recording, a current of 1 mA with a duration of 20 s was applied to the recording site in the olfactory bulb (OB) through the recording and indifferent electrodes (1, 2). The animal was given a cardiac perfusion with physiological saline and followed by a mixture of 4% paraformaldehyde in 0.1 M phosphate buffer of pH 7.4. The brain was then removed from the cranium, fixed by immersion in 4% paraformaldehyde in a 0.1-M phosphate buffer, and stored in PBS solution containing 20% sucrose at 4 °C. After the brain was embedded in OCT (optimal cutting temperature) compound, 40- $\mu$ m coronal sections were obtained with a cryostat. The tissue sections were mounted onto glass slides and stained using the Nissl method. The electrolytic lesion was examined under a light microscope. All recording electrodes were at the expected layers, as shown in Fig. S3.

**Data Processing.** The methods to identify neuronal spikes are similar to the previously reported (3, 4). Briefly, off-line analysis (Spike-2; CED) was used to create a spike template, which excludes artifacts of the stimulus and identifies high signal-to-noise ratio units from one to four neurons per microelectrode. The artifact-free spike template was then used to create a temporal history of the ensemble by converting to spiking frequency ( $\nu$ )

with 0.25-s bins. The template created from the light anesthesia data were used to analyze the data from both light and deep anesthesia. Another template was created from deep anesthesia data and also used to analyze the data from both deep and light anesthesia. Results from both templates yielded consistent results that matched well ( $\pm 10\%$  in amplitude and  $\pm 0.1$  ms in shape), suggesting that the template recognition process was not biased to specific anesthetic state nor were there any microelectrode movements during transition between the baselines (3, 4). Spike analysis from 29 recording sites provided 69 neurons in the neuronal ensemble.

Raw data [both local field potential (LFP) and multiunit spiking signals] from 4 s before to 6 s after the onset of the odor stimulus were selected for further process. These 10-s data were binned with a width of 0.256 s (512 sample points for LFP). Time courses of LFP, multiunit, or spiking rate were obtained for each recording. Spectrum analysis and calculation of the spectrum power of LFP and spike count of multiunit activity were performed using spike software (Spike-2; CED). After time-frequency transformation analysis (Fourier Transform, Hanning window) of the LFP, the following three frequency bands of LFP were filtered for further process: 12 to 32 Hz, 33 to 64 Hz, and 65 to 90 Hz. The selected three frequency bands are comparable to other OB studies (5, 6).

1. Fontanini A, Bower JM (2005) Variable coupling between olfactory system activity and respiration in ketamine/xylazine anesthetized rats. *J Neurophysiol* 93:3573–3581.
2. Murakami M, Kashiwadani H, Kirino Y, Mori K (2005) State-dependent sensory gating in olfactory cortex. *Neuron* 46:285–296.
3. Smith AJ, et al. (2002) Cerebral energetics and spiking frequency: The neurophysiological basis of fMRI. *Proc Natl Acad Sci USA* 99:10765–10770.
4. Hyder F, Rothman DL, Shulman RG (2002) Total neuroenergetics support localized brain activity: Implications for the interpretation of fMRI. *Proc Natl Acad Sci USA* 99:10771–10776.
5. Neville KR, Haberly LB (2003) Beta and gamma oscillations in the olfactory system of the urethane-anesthetized rat. *J Neurophysiol* 90:3921–3930.
6. Rojas-Libano D, Kay LM (2008) Olfactory system gamma oscillations: The physiological dissection of a cognitive neural system. *Cogn Neurodyn* 2:179–194.

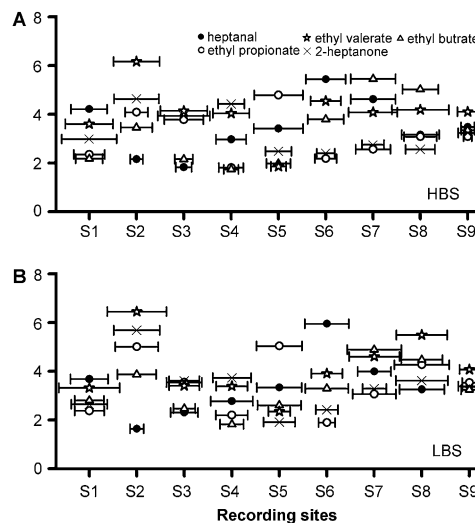

**Fig. S1.** LFP signals of five odorants at nine recording sites (S1–S9) in the GCL. (A and B) The LFP signals under high brain state (HBS) and low brain state (LBS), respectively. Because the error bars of an odorant at a given site will overlap with the others, they are presented in horizontal orientation but with the same scale as in the y axis. Data are from nine rats, each odor with four to six repeats at each recording site.



**Table S1. Effects of anesthetics and recording locations on the LFP signals in LBS and HBS**

|          |               | GCL, chloral hydrate |                 | GCL, pentobarbital |                 | MCL, chloral hydrate |                 |
|----------|---------------|----------------------|-----------------|--------------------|-----------------|----------------------|-----------------|
|          |               | Rest                 | Activated       | Rest               | Activated       | Rest                 | Activated       |
| 12–32 Hz | LBS           | 0.46 (0.04)          | 2.72 (0.21)     | 0.61 (0.05)        | 2.12 (0.12)     | 0.76 (0.05)          | 2.27 (0.11)     |
|          | HBS           | 1.00 (0.04)          | 2.87 (0.20)     | 1.00 (0.04)        | 2.27 (0.15)     | 1.00 (0.03)          | 2.15 (0.08)     |
|          | <i>t</i> test | <i>P</i> < 0.001     | <i>P</i> = 0.46 | <i>P</i> < 0.001   | <i>P</i> = 0.43 | <i>P</i> < 0.001     | <i>P</i> = 0.44 |
| 33–64Hz  | LBS           | 0.54 (0.05)          | 3.39 (0.20)     | 0.50 (0.04)        | 1.52 (0.10)     | 0.54 (0.02)          | 1.77 (0.05)     |
|          | HBS           | 1.00 (0.04)          | 3.44 (0.18)     | 1.00 (0.04)        | 1.75 (0.10)     | 1.00 (0.02)          | 1.86 (0.05)     |
|          | <i>t</i> test | <i>P</i> < 0.001     | <i>P</i> = 0.67 | <i>P</i> < 0.001   | <i>P</i> = 0.16 | <i>P</i> < 0.001     | <i>P</i> = 0.20 |
| 65–90 Hz | LBS           | 0.40 (0.02)          | 2.29 (0.05)     | 0.47 (0.02)        | 1.32 (0.08)     | 0.33 (0.01)          | 2.13 (0.06)     |
|          | HBS           | 1.00 (0.03)          | 2.32 (0.07)     | 1.00 (0.03)        | 1.47 (0.08)     | 1.00 (0.02)          | 2.04 (0.03)     |
|          | <i>t</i> test | <i>P</i> < 0.001     | <i>P</i> = 0.80 | <i>P</i> < 0.001   | <i>P</i> = 0.23 | <i>P</i> < 0.001     | <i>P</i> = 0.23 |

GCL, with chloral hydrate as anesthetic: data are from 12 rats, 12 recording sites for both LBS and HBS, each site repeated six times for each brain state. GCL, with pentobarbital as anesthetic: data are from 13 rats, 13 recording sites for both LBS and HBS, each site repeated four to six times for each brain state. MCL, with chloral hydrate as anesthetic: data are from 19 rats, 29 recording sites for both LBS and HBS, each site repeated four to six times for each brain state. Numbers in parentheses are SEs.

**Table S2. Statistical comparisons of activities patterns across the nine recording sites for different odorants under different brain states**

|         |    | Odorants |       |       |       |       | Ave          | SD          |
|---------|----|----------|-------|-------|-------|-------|--------------|-------------|
|         |    | O1       | O1    | O1    | O1    | O1    |              |             |
| HBS     |    |          |       |       |       |       |              |             |
|         | O1 |          | −0.16 | −0.19 | −0.54 | 0.04  |              |             |
|         | O2 | −0.16    |       | 0.36  | 0.37  | −0.40 |              |             |
|         | O3 | −0.19    | 0.36  |       | −0.21 | 0.56  |              |             |
|         | O4 | −0.54    | 0.37  | −0.21 |       | −0.73 |              |             |
|         | O5 | 0.04     | −0.40 | 0.57  | −0.73 |       | <b>−0.09</b> | <b>0.41</b> |
| LBS     |    |          |       |       |       |       |              |             |
|         | O1 |          | 0.26  | 0.32  | −0.60 | 0.33  |              |             |
|         | O2 | 0.26     |       | 0.71  | 0.15  | 0.25  |              |             |
|         | O3 | 0.32     | 0.71  |       | −0.29 | 0.81  |              |             |
|         | O4 | −0.60    | 0.15  | −0.29 |       | −0.70 |              |             |
|         | O5 | 0.33     | 0.25  | 0.81  | −0.70 |       | <b>0.12</b>  | <b>0.49</b> |
| LBS/HBS |    |          |       |       |       |       |              |             |
|         |    | 0.91     | 0.96  | 0.84  | 0.94  | 0.79  | <b>0.89</b>  | <b>0.07</b> |

LBS: Pearson correlations among the activity patterns elicited by five odors (O1–O5) under LBS (the circle profiles in Fig. 2B). HBS: Pearson correlations among the activity patterns elicited by five odors under HBS (the filled circle profiles in Fig. 2B). HBS/LBS: Pearson correlations between the activity patterns of a given odorant under HBS and LBS (the circle and filled circle profiles in the same panel in Fig. 2B). The boldface small average correlation coefficients (Ave) and the large SD (SD) in the LBS and HBS sections indicate high site specificity for these odorants; the large average correlation coefficient and small SD in the HBS/LBS section indicate that the selectivity is similar under these two brain states. Raw data are from Table S4.

**Table S3. Statistical comparison of the activity patterns across the five odorants among the nine sites**

|                | Recording site |       |       |       |       |       |       |       |       | Ave         | SD          |
|----------------|----------------|-------|-------|-------|-------|-------|-------|-------|-------|-------------|-------------|
|                | S1             | S2    | S3    | S4    | S5    | S6    | S7    | S8    | S9    |             |             |
| <b>LBS</b>     |                |       |       |       |       |       |       |       |       |             |             |
| S1             |                | -0.49 | -0.59 | 0.24  | -0.30 | 0.97  | 0.50  | -0.06 | 0.25  |             |             |
| S2             | -0.49          |       | 0.87  | 0.44  | -0.25 | -0.69 | -0.11 | 0.68  | 0.63  |             |             |
| S3             | -0.59          | 0.87  |       | 0.51  | 0.05  | -0.75 | -0.57 | 0.33  | 0.49  |             |             |
| S4             | 0.24           | 0.44  | 0.51  |       | -0.58 | 0.07  | -0.24 | -0.03 | 0.45  |             |             |
| S5             | -0.30          | -0.25 | 0.05  | -0.58 |       | -0.19 | -0.48 | -0.12 | -0.09 |             |             |
| S6             | 0.97           | -0.69 | -0.75 | 0.07  | -0.19 |       | 0.46  | -0.24 | 0.02  |             |             |
| S7             | 0.50           | -0.11 | -0.57 | -0.24 | -0.48 | 0.46  |       | 0.51  | 0.18  |             |             |
| S8             | -0.06          | 0.68  | 0.33  | -0.03 | -0.12 | -0.24 | 0.51  |       | 0.77  |             |             |
| S9             | 0.25           | 0.63  | 0.49  | 0.45  | -0.09 | 0.02  | 0.18  | 0.77  |       | <b>0.07</b> | <b>0.47</b> |
| <b>HBS</b>     |                |       |       |       |       |       |       |       |       |             |             |
| S1             |                | -0.11 | -0.17 | 0.57  | -0.11 | 0.75  | 0.14  | -0.30 | 0.57  |             |             |
| S2             | -0.11          |       | 0.88  | 0.52  | -0.39 | -0.29 | -0.36 | 0.10  | 0.53  |             |             |
| S3             | -0.17          | 0.88  |       | 0.50  | 0.01  | -0.59 | -0.75 | -0.32 | 0.18  |             |             |
| S4             | 0.57           | 0.52  | 0.50  |       | -0.46 | 0.10  | -0.30 | -0.42 | 0.48  |             |             |
| S5             | -0.11          | -0.39 | 0.01  | -0.46 |       | -0.35 | -0.55 | -0.56 | -0.61 |             |             |
| S6             | 0.75           | -0.29 | -0.59 | 0.10  | -0.35 |       | 0.74  | 0.37  | 0.66  |             |             |
| S7             | 0.14           | -0.36 | -0.75 | -0.30 | -0.55 | 0.74  |       | 0.80  | 0.37  |             |             |
| S8             | -0.30          | 0.10  | -0.32 | -0.42 | -0.56 | 0.37  | 0.80  |       | 0.41  |             |             |
| S9             | 0.57           | 0.53  | 0.18  | 0.48  | -0.61 | 0.66  | 0.37  | 0.41  |       | <b>0.06</b> | <b>0.48</b> |
| <b>HBS/LBS</b> |                |       |       |       |       |       |       |       |       |             |             |
|                | 0.98           | 0.99  | 0.98  | 0.99  | 0.98  | 0.99  | 0.98  | 0.96  | 0.99  | <b>0.98</b> | <b>0.01</b> |

LBS: Pearson correlations among all nine sites under LBS (data in columns of Fig. S1B). HBS: Pearson correlations among all nine sites under HBS (data in columns of Fig. S1A). HBS/LBS: Pearson correlations for the nine sites between HBS and LBS for the same odorant. The boldface small average correlation coefficient (Ave) and the large SD (SD) in the LBS and HBS sections indicate high site specificity for these odorants; the large average correlation coefficient and small SD in the HBS/LBS section indicates that the selectivity at a given site is similar under these two brain states. Raw data are from Table S4 and shown in Fig. S1.

**Table S4. The LFP signals of different odorants at different sites in HBS and LBS**

|    |                           | O1           | O2          | O3          | O4          | O5          |
|----|---------------------------|--------------|-------------|-------------|-------------|-------------|
| S1 | HBS                       | 2.35 (0.33)  | 2.17 (0.28) | 3.60 (0.50) | 4.21 (0.38) | 2.99 (0.58) |
|    | LBS                       | 2.37 (0.31)  | 2.79 (0.31) | 3.31 (0.64) | 3.67 (0.40) | 2.64 (0.38) |
|    | <i>P</i> ( <i>t</i> test) | 0.96         | 0.14        | 0.73        | 0.33        | 0.62        |
| S2 | HBS                       | 4.08 (0.24)  | 3.46 (0.33) | 6.17 (0.49) | 2.15 (0.14) | 4.64 (0.47) |
|    | LBS                       | 4.99 (0.45)  | 3.86 (0.41) | 6.44 (0.62) | 1.63 (0.14) | 5.67 (0.48) |
|    | <i>P</i> ( <i>t</i> test) | 0.07         | 0.44        | 0.73        | 0.01        | 0.14        |
| S3 | HBS                       | 3.78 (0.41)  | 2.16 (0.19) | 4.14 (0.49) | 1.82 (0.17) | 3.93 (0.55) |
|    | LBS                       | 3.54 (0.37)  | 2.47 (0.23) | 3.40 (0.32) | 2.30 (0.29) | 3.60 (0.32) |
|    | <i>P</i> ( <i>t</i> test) | 0.66         | 0.30        | 0.21        | 0.16        | 0.61        |
| S4 | HBS                       | 1.81 (0.26)  | 1.74 (0.16) | 4.04 (0.39) | 2.97 (0.32) | 4.43 (0.28) |
|    | LBS                       | 2.19 (0.33)  | 1.82 (0.25) | 3.38 (0.33) | 2.77 (0.44) | 3.73 (0.40) |
|    | <i>P</i> ( <i>t</i> test) | 0.38         | 0.77        | 0.20        | 0.71        | 0.16        |
| S5 | HBS                       | 4.79 (0.51)  | 1.98 (0.25) | 1.86 (0.16) | 3.41 (0.52) | 2.48 (0.28) |
|    | LBS                       | 5.03 (0.48)  | 2.60 (0.46) | 2.34 (0.23) | 3.33 (0.47) | 1.91 (0.33) |
|    | <i>P</i> ( <i>t</i> test) | 0.74         | 0.24        | 0.09        | 0.91        | 0.19        |
| S6 | HBS                       | 2.18 (0.023) | 3.79 (0.38) | 4.54 (0.32) | 5.44 (0.42) | 2.40 (0.19) |
|    | LBS                       | 1.89 (0.02)  | 3.28 (0.46) | 3.90 (0.33) | 5.94 (0.46) | 2.41 (0.24) |
|    | <i>P</i> ( <i>t</i> test) | 0.31         | 0.40        | 0.17        | 0.42        | 0.97        |
| S7 | HBS                       | 2.56 (0.37)  | 5.46 (0.47) | 4.09 (0.51) | 4.62 (0.47) | 2.75 (0.23) |
|    | LBS                       | 3.06 (0.46)  | 4.88 (0.57) | 4.60 (0.53) | 3.98 (0.35) | 3.28 (0.25) |
|    | <i>P</i> ( <i>t</i> test) | 0.40         | 0.43        | 0.49        | 0.28        | 0.13        |
| S8 | HBS                       | 3.08 (0.35)  | 5.02 (0.38) | 4.19 (0.60) | 3.17 (0.39) | 2.56 (0.31) |
|    | LBS                       | 4.25 (0.58)  | 4.47 (0.43) | 5.48 (0.53) | 3.25 (0.47) | 3.61 (0.55) |
|    | <i>P</i> ( <i>t</i> test) | 0.09         | 0.34        | 0.12        | 0.89        | 0.10        |
| S9 | HBS                       | 3.08 (0.09)  | 3.34 (0.14) | 4.10 (0.22) | 3.48 (0.14) | 3.23 (0.20) |
|    | LBS                       | 3.52 (0.15)  | 3.24 (0.17) | 4.07 (0.21) | 3.36 (0.15) | 3.38 (0.23) |
|    | <i>P</i> ( <i>t</i> test) | 0.02         | 0.62        | 0.89        | 0.55        | 0.64        |

Recording at each site (1–9) is repeated for four to six times for each odorant (O1–O5). Numbers in parentheses are SEs. O1 to O5 are ethyl propionate, ethyl butyrate, ethyl valerate, heptanal, and 2-heptanone. Because the baseline activities at HBS and LBS are similar to those in Table S1, they are omitted here.

**Table S5. Effects of odor concentration on LFP signals**

|                     |           | 12–32 Hz    |             |                  | 33–64 Hz    |             |                  | 65–90 Hz    |             |                  |
|---------------------|-----------|-------------|-------------|------------------|-------------|-------------|------------------|-------------|-------------|------------------|
|                     |           | LBS         | HBS         | <i>t</i> test    | LBS         | HBS         | <i>t</i> test    | LBS         | HBS         | <i>t</i> test    |
| C1                  | Rest      | 0.62 (0.05) | 1.00 (0.06) | <i>P</i> < 0.001 | 0.48 (0.03) | 1.00 (0.03) | <i>P</i> < 0.001 | 0.54 (0.03) | 1.00 (0.03) | <i>P</i> < 0.001 |
|                     | Activated | 2.15 (0.18) | 2.44 (0.12) | <i>P</i> = 0.20  | 1.77 (0.17) | 1.99 (0.08) | <i>P</i> = 0.22  | 1.47 (0.14) | 1.56 (0.05) | <i>P</i> = 0.56  |
| C2                  | Rest      | 0.62 (0.03) | 1.00 (0.07) | <i>P</i> < 0.001 | 0.56 (0.03) | 1.00 (0.04) | <i>P</i> < 0.001 | 0.50 (0.01) | 1.00 (0.02) | <i>P</i> < 0.001 |
|                     | Activated | 2.73 (0.15) | 3.24 (0.19) | <i>P</i> = 0.06  | 2.78 (0.22) | 2.96 (0.15) | <i>P</i> = 0.52  | 1.75 (0.07) | 1.74 (0.10) | <i>P</i> = 0.92  |
| C3                  | Rest      | 0.60 (0.06) | 1.00 (0.07) | <i>P</i> < 0.001 | 0.51 (0.03) | 1.00 (0.04) | <i>P</i> < 0.001 | 0.49 (0.01) | 1.00 (0.02) | <i>P</i> < 0.001 |
|                     | Activated | 3.22 (0.19) | 3.51 (0.20) | <i>P</i> = 0.30  | 3.75 (0.15) | 4.15 (0.25) | <i>P</i> = 0.19  | 3.16 (0.08) | 3.22 (0.16) | <i>P</i> = 0.70  |
| Pearson correlation |           | 0.989       | 0.928       |                  | 0.993       | 0.999       |                  | 0.965       | 0.949       |                  |

The LFP signals are significantly correlated with odor concentration, with an averaged coefficient of 0.97 for six possible conditions. C1, C2, and C3 are the air stream flowing over pure odorants and then diluted by 26-, 11-, and 6-fold (or 3.8%, 9.1%, and 16.7%); anesthetics, chloral hydrate; data are from seven rats, 14 recoding sites, each site with four to six repeated exposures.
